# Supplementary material
Source: Springer Nature journal article supplement (https://www.springermedizin.de/resource/supplementary/13063_2013_2105_MOESM2_ESM.pdf/9621390)
Supplement: MOESM2 [file 9621390]

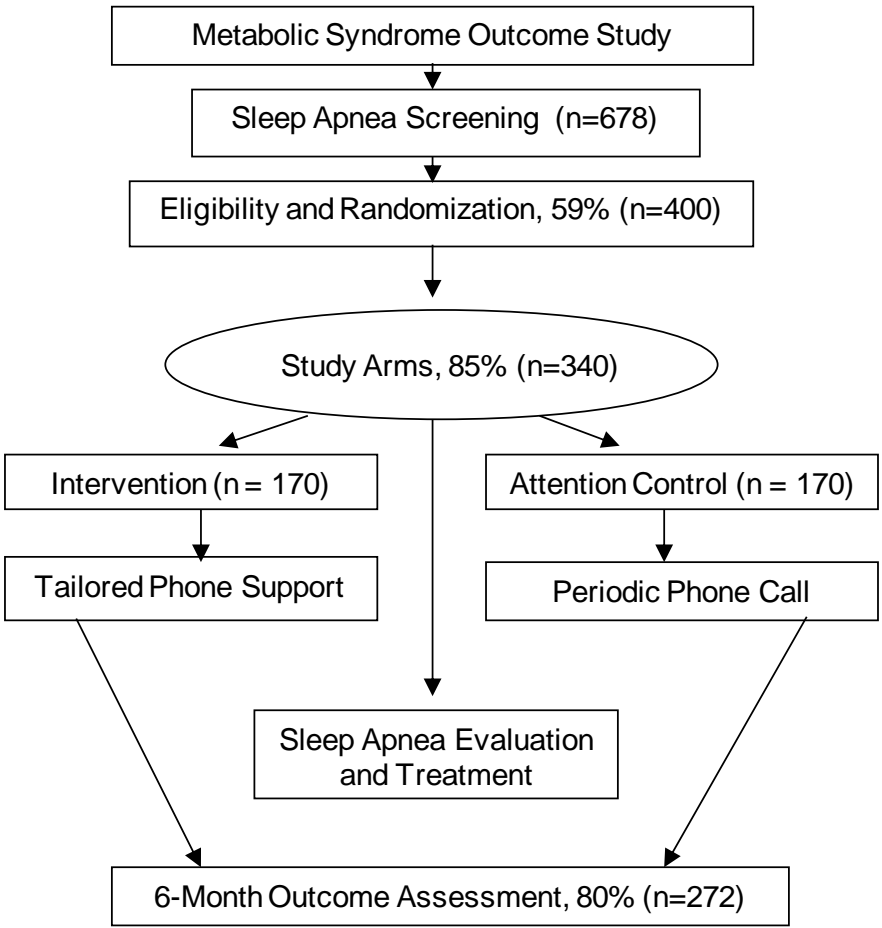

Metabolic Syndrome Outcome Study

Sleep Apnea Screening (n=678)

Eligibility and Randomization, 59% (n=400)

Study Arms, 85% (n=340)

Intervention (n = 170)

Attention Control (n = 170)

Tailored Phone Support

Periodic Phone Call

Sleep Apnea Evaluation  
and Treatment

6-Month Outcome Assessment, 80% (n=272)
